# Supplementary material
Source: Springer Nature journal article supplement (https://www.springermedizin.de/resource/supplementary/12889_2011_3901_MOESM3_ESM.pdf/9489736)

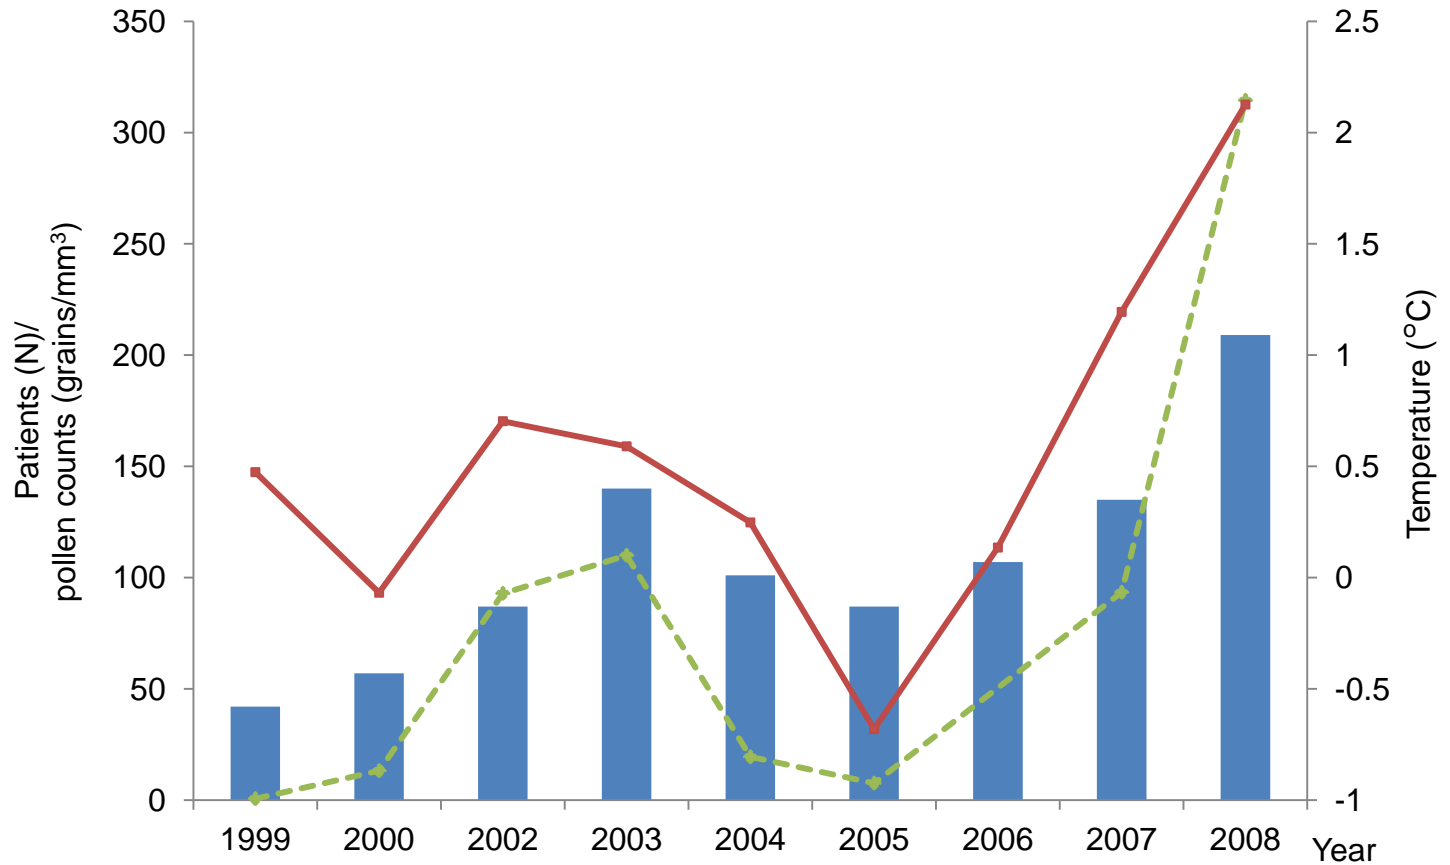

■ Patients with tree pollen allergy    -◆- Tree pollen counts    -■- Minimum temperature

Supplement: MOESM3 [file 9489736]
